1  
2  
3  
4  
5  
6  
7  
8  
9

# Evaluating the use of GPT-3.5-turbo to provide clinical recommendations in the Emergency Department

13  
14  
15  
16  
17  
18

Christopher Y.K. Williams (MB BChir)<sup>1\*</sup>, Brenda Y. Miao (BA)<sup>1</sup>, Atul J. Butte (MD, PhD)<sup>1</sup>

<sup>1</sup>Bakar Computational Health Sciences Institute, University of California, San Francisco,  
San Francisco, CA, USA

19  
20  
21  
22  
23  
24

\*Corresponding author:

Dr Christopher Y.K. Williams

Postdoctoral Scholar; Bakar Computational Health Sciences Institute, UCSF

[cykw2@doctors.org.uk](mailto:cykw2@doctors.org.uk)

Word count: 2773 words

25 **Abstract**

26

27 The release of GPT-3.5-turbo (ChatGPT) and other large language models (LLMs) has the  
28 potential to transform healthcare. However, existing research evaluating LLM performance  
29 on real-world clinical notes is limited. Here, we conduct a highly-powered study to determine  
30 whether GPT-3.5-turbo can provide clinical recommendations for three tasks (admission  
31 status, radiological investigation(s) request status, and antibiotic prescription status) using  
32 clinical notes from the Emergency Department. We randomly select 10,000 Emergency  
33 Department visits to evaluate the accuracy of zero-shot, GPT-3.5-turbo-generated clinical  
34 recommendations across four different prompting strategies. We find that GPT-3.5-turbo  
35 performs poorly compared to a resident physician, with accuracy scores 24% lower on  
36 average. GPT-3.5-turbo tended to be overly cautious in its recommendations, with high  
37 sensitivity at the cost of specificity. Our findings demonstrate that, while early evaluations of  
38 the clinical use of LLMs are promising, LLM performance must be significantly improved  
39 before their deployment as decision support systems for clinical recommendations and other  
40 complex tasks.

41

## 42 **Introduction**

43

44 Since its November 2022 launch, the Chat Generative Pre-Trained Transformer (ChatGPT;  
45 GPT-3.5-turbo) has captured widespread public attention, with media reports suggesting over  
46 100 million monthly active users just two months after launch.<sup>1</sup> Along with its successor,  
47 GPT-4, these large language models (LLMs) use a chat-based interface to respond to  
48 complex queries and solve problems.<sup>2,3</sup> Although trained as general-purpose models,  
49 researchers have begun evaluating the performance of GPT-3.5-turbo and GPT-4 on  
50 clinically-relevant tasks. For instance, GPT-3.5-turbo was found to provide largely  
51 appropriate responses when asked to give simple cardiovascular disease prevention  
52 recommendations.<sup>4</sup> Meanwhile, GPT-3.5-turbo responses to patients' health questions on a  
53 public social media forum were both preferred, and rated as having higher empathy,  
54 compared to physician responses.<sup>5</sup>

55

56 While there are a growing number of studies that explore the uses of the GPT models across a  
57 range of clinical tasks, the majority do not use real-world clinical notes. They instead apply  
58 these models to answer questions from medical examinations such as the USMLE, solve  
59 publicly available clinical diagnostic challenges such as the *New England Journal of*  
60 *Medicine* (NEJM) clinicopathologic conferences, or evaluate performance on existing clinical  
61 benchmarks.<sup>3,6-9</sup> This is due to the challenges associated with disclosing protected health  
62 information (PHI) with LLM providers such as OpenAI in a Health Insurance Portability and  
63 Accountability Act (HIPAA) compliant manner, where business associate agreements must  
64 be in place to allow secure processing of PHI content.<sup>10</sup> This is a notable hurdle given the  
65 inherent differences between curated medical datasets, such as the USMLE question bank,  
66 and real-world clinical notes. In addition, this issue is particularly problematic when you

67 consider that the GPT models have likely been trained on data obtained from open sources on  
68 the Internet and therefore their evaluation on existing publicly available benchmarks or tasks  
69 may be confounded by data leakage.<sup>11</sup>

70

71 As the availability and accessibility of these models increases, it is now critically important to  
72 better understand the potential uses and limitations of LLMs applied to actual clinical notes.

73 In our previous work, we showed that GPT-3.5-turbo could accurately identify the higher  
74 acuity patient when provided only the clinical histories of pairs of patients presenting to the  
75 Emergency Department.<sup>12</sup> This was despite a lack of additional training or fine-tuning,  
76 known as zero-shot learning.<sup>13</sup> Elsewhere, Kanjee and colleagues evaluated the diagnostic  
77 ability of GPT-4 across 70 cases from the NEJM clinicopathologic conferences, obtaining a  
78 correct diagnosis in its differential in 64% of cases and as its top diagnosis in 39%.<sup>7</sup>

79 However, the ability of these general-purpose large language models to assimilate clinical  
80 information from de-identified clinical notes and return clinical recommendations is still  
81 unclear.

82

83 In this study, we sought to evaluate the zero-shot performance of GPT-3.5-turbo when  
84 prompted to provide clinical recommendations for patients evaluated in the Emergency  
85 Department. We focus on three recommendations in particular: 1) Should the patient be  
86 admitted to hospital; 2) Should the patient have radiological investigations requested; and 3)  
87 Should the patient receive antibiotics? We first evaluate performance on balanced (i.e equal  
88 numbers of positive and negative outcomes) datasets, to examine the sensitivity and  
89 specificity of GPT recommendations, before determining overall model accuracy on an  
90 unbalanced dataset that reflects real-world distributions of patients presenting to the  
91 Emergency Department.

92

## Results

93

94 From a total of 251,401 adult Emergency Department visits, we first created balanced  
95 samples of 10,000 ED visits for each of the three tasks (Figure 1). Using only the information  
96 provided in the *Presenting History* and *Physical Examination* sections of patients' first ED  
97 physician note, we queried GPT-3.5-turbo to determine whether 1) the patient should be  
98 admitted to hospital, 2) the patient requires radiological investigation(s), and 3) the patient  
99 requires antibiotics, comparing its output to the ground-truth outcome extracted from the  
100 electronic health record.

101

102 Across all three clinical recommendation tasks, overall GPT-3.5-turbo performance was poor  
103 (Table 1). The initial prompt of 'Please return whether the patient should be admitted to  
104 hospital / requires radiological investigation / requires antibiotics' (Prompt A) led to high  
105 sensitivity and low specificity performance. For this prompt, GPT-3.5-turbo  
106 recommendations had a high true positive rate but similarly high false positive rate, with  
107 GPT-3.5-turbo recommending admission / radiological investigation / antibiotic prescription  
108 for the majority of cases. Altering the prompt to 'only suggest ... if absolutely required'  
109 (Prompt B) only marginally improved specificity. The greatest performance was achieved by  
110 removing restrictions on the verbosity of GPT-3.5-turbo response (Prompt C) and adding the  
111 'Let's think step by step' chain-of-thought prompting (Prompt D). These prompts generated  
112 the highest specificity in GPT-3.5-turbo recommendations with limited effect on sensitivity.

113

114 To compare this performance with that of a resident physician, we took a balanced  $n = 200$   
115 subsample for manual annotation and compared performance between physician and machine  
116 across each of the four prompt iterations (Table 2). Notably, physician sensitivity was below

117 that of GPT-3.5-turbo responses (0.73 vs [range: 0.93-1.00], 0.76 vs [range: 0.93-0.96] and  
118 0.64 vs [range: 0.89-0.93] for admission, radiological investigation, and antibiotic  
119 prescription tasks, respectively), but specificity was significantly higher than GPT-3.5-turbo  
120 (0.74 vs [range: 0.07-0.40], 0.79 vs [range: 0.09-0.17] and 0.78 vs [range: 0.26-0.37]).

121

122 We next sought to test the performance of GPT-3.5-turbo in a more representative setting  
123 using an unbalanced, n = 1000 sample of ED visits that reflects the real-world distribution of  
124 admission, radiological investigation, and antibiotic prescription rates at our institution (Table  
125 3). We found that the accuracy of resident physician recommendations, when evaluated  
126 against the ground-truth outcomes extracted from the electronic health record, was  
127 significantly higher than GPT-3.5-turbo recommendations: 0.83 for physician vs [range:  
128 0.29-0.53 for GPT-3.5-turbo], 0.79 vs [range: 0.68-0.71] and 0.78 vs [range: 0.35-0.43] for  
129 admission, radiological investigation, and antibiotic prescription tasks, respectively (Figure 2;  
130 Table 3).

131

132 Lastly, in our sensitivity analyses conducted on a balanced, n = 200 subsample for each task,  
133 results were largely similar regardless of the written order of labels in the original prompt (e.g  
134 ‘0: Patient should be admitted to hospital. 1: Patient should not be admitted to hospital.’ vs  
135 ‘1: Patient should be admitted to hospital. 0: Patient should not be admitted to hospital.’)  
136 (Table S3). Reversing the order of labels in the original prompt led to almost identical results  
137 for all tasks except the antibiotic prescription task, where specificity was improved for  
138 Prompts 2-4, but at the cost of sensitivity.

139

140

141 **Discussion**

142 This study represents an early, highly powered evaluation of the potential uses and limitations  
143 of GPT-3.5-turbo for generating clinical recommendations based on real-world clinical text.  
144 Across three different clinical recommendation tasks, we found that GPT-3.5-turbo  
145 performed poorly, with high sensitivity but low specificity across tasks. Model performance  
146 was marginally improved with iterations of prompt engineering, including the addition of  
147 zero-shot chain-of-thought prompting.<sup>14</sup> On evaluation of an unbalanced (n = 1000) sample  
148 reflective of the real-world distribution of clinical recommendations, GPT-3.5-turbo  
149 performance was significantly worse than that of a resident physician, with 24% lower  
150 accuracy averaged across tasks.

151

152 Our results suggest that GPT-3.5-turbo is overly cautious in its clinical recommendations – it  
153 exhibits a tendency to recommend intervention for each of the three tasks and this leads to a  
154 notable number of false positive suggestions. Such a finding is problematic given the need to  
155 both prioritize hospital resource availability and reduce overall healthcare costs.<sup>15,16</sup> This is  
156 also true at the patient level, where there is an increasing appreciation that excessive  
157 investigation and/or treatment may cause patients harm.<sup>16</sup> It is unclear, however, what is the  
158 best balance of sensitivity/specificity to strive for amongst clinical large language models – it  
159 is likely that this balance will differ based on the particular task. The increase in GPT-3.5-  
160 turbo specificity, at the expense of sensitivity, across our iterations of prompt engineering  
161 suggests that improvements could be made bespoke to the task, though the extent to which  
162 prompt engineering alone may improve performance is unclear.

163

164 Across all three tasks, overall performance remained notably below that of a human  
165 physician. This may reflect the inherent complexity of clinical decision making, where

166 clinical recommendations may be influenced not only by the patient’s intrinsic clinical status,  
167 but also by patient preference, current resource availability and other external factors.

168

169 Before large language models can be integrated within the clinical environment, it is  
170 important to fully understand both their capabilities and limitations. Otherwise, there is a risk  
171 of unintended harmful consequences, especially if models have been deployed at scale.<sup>17,18</sup>

172 Current research deploying large language models, particularly the current state-of-the-art  
173 GPT models, on real-world clinical text is limited. Recent work from our group has  
174 demonstrated accurate performance of GPT-3.5-turbo in both assessing patient clinical acuity  
175 in the Emergency Department and extracting detailed oncologic history and treatment plans  
176 from medical oncology notes.<sup>19</sup> Elsewhere, GPT-3.5-turbo has been used to convert radiology  
177 reports into plain language, to classify whether statements of clinical recommendations in  
178 scientific literature constitute health advice, and to accurately classify five diseases from  
179 discharge summaries in the MIMIC-III dataset.<sup>20-22</sup> Much of the current literature focuses on  
180 the strengths of large language models such as GPT-3.5-turbo and GPT-4.<sup>3,9,12,19</sup> However, it  
181 is equally important to identify areas of medicine in which LLMs do not perform well. For  
182 example, in one evaluation of GPT-4’s ability to diagnose dementia from a set of structured  
183 features, GPT-4 did not surpass the performance of traditional AI tools, while fewer than  
184 20% of GPT-3.5-turbo and GPT-4 responses submitted to a clinical informatics consult  
185 service were found to be concordant with existing reports.<sup>23,24</sup> While early signs of the utility  
186 of large language models in medicine are promising, our findings suggest that there remains  
187 significant room for improvement, especially in more challenging tasks such as complex  
188 clinical decision making.

189



190 This study has several limitations. Firstly, it is possible that, for each task, not all the  
191 information which led to the real-life clinical recommendation extracted from the electronic  
192 health record was present in the *Presenting History* and *Physical Examination* sections of the  
193 ED physician note. For instance, radiological investigations requested following the  
194 Emergency Medicine physician review may lead to unexpected and/or incidental findings  
195 which were not detected during the initial review and may warrant admission or antibiotic  
196 prescription. However, even with this limitation, physician classification performance  
197 remained a very respectable 78-83% accuracy across the three tasks, suggesting it is  
198 challenging, but not impossible, to make accurate clinical recommendations based on the  
199 available clinical text. Secondly, we only trialled three iterations of prompt engineering, in  
200 addition to our initial prompt, and this was done in a zero-shot manner. Further attempts to  
201 refine the provided prompt, or incorporate few-shot examples for in-context learning, may  
202 improve model performance.<sup>13,25-27</sup> Lastly, this study did not evaluate the performance of the  
203 recently released, more advanced GPT-4 model. It is possible that GPT-4 performance may  
204 surpass that of GPT-3.5-turbo in these more complex reasoning tasks, though the ability to  
205 test this at a similar scale is limited by the increased costs associated with GPT-4 usage  
206 across a sample of this size. Similarly, evaluation of the performance of other natural  
207 language processing models, such as a fine-tuned BioClinicalBERT model or bag-of-word-  
208 based and other simpler techniques, has not been performed.<sup>28</sup> It is possible that these more  
209 traditional NLP models, which are typically trained or fine-tuned on a large training set of  
210 data, may outperform the zero-shot performance of GPT-like large language models.<sup>21</sup>

211

212

## Methods

213

214 The UCSF Information Commons contains deidentified structured clinical data as well as  
215 deidentified clinical text notes, deidentified and externally certified as previously described.<sup>29</sup>

216 The UCSF Institutional Review Board determined that this use of the deidentified data within  
217 the UCSF Information Commons is not human participants research and therefore was  
218 exempt from further approval and informed consent.

219

220 We identified all adult visits to the University of California San Francisco (UCSF)  
221 Emergency Department (ED) from 2012 to 2023 with an ED Physician note present within  
222 Information Commons (Figure 1). Regular expressions were used to extract the *Presenting*  
223 *History* (consisting of ‘Chief Complaint’, ‘History of Presenting Illness’ and ‘Review of  
224 Systems’) and *Physical Examination* sections from each note (Supplementary File 1).

225

226 We sought to evaluate GPT-3.5-turbo performance on three binary clinical recommendation  
227 tasks, corresponding to the following outcomes: 1) Admission status – whether the patient  
228 should be admitted from ED to hospital. 2) Radiological investigation(s) request status –  
229 whether an X-ray, US scan, CT scan, or MRI scan should be requested during the ED visit. 3)  
230 Antibiotic prescription status – whether antibiotics should be ordered during the ED visit.

231

232 For each of the three outcomes, we randomly selected a balanced sample of 10,000 ED visits  
233 to evaluate GPT-3.5-turbo performance (Figure 1). Using its secure, HIPAA-compliant  
234 Application Programming Interface (API) through Microsoft Azure, we provided GPT-3.5-  
235 turbo (model *gpt-3.5-turbo-0301*) the *Presenting History* and *Physical Examination* sections  
236 of the ED Physician’s note for each ED visit and queried it to determine if 1) the patient  
237 should be admitted to hospital, 2) the patient requires radiological investigation, and 3) the

238 patient should be prescribed antibiotics. GPT-3.5-turbo performance was evaluated against  
239 the ground-truth outcome extracted from the electronic health record. Separately, a resident  
240 blinded to both the GPT-3.5-turbo labels and ground-truth labels reviewed a balanced  $n = 200$   
241 subsample for each of the three tasks to allow a comparison of human and machine  
242 performance. The following evaluation metrics were calculated: true positive rate, true  
243 negative rate, false positive rate, false negative rate, sensitivity and specificity.

244

245 We subsequently experimented with three iterations of prompt engineering (Table S1,  
246 Supplementary File 1) to test if modifications to the initial prompt could improve GPT-3.5-  
247 turbo performance. Chain-of-thought (CoT) prompting is a method found to improve the  
248 ability of large language models to perform complex reasoning by decomposing multi-step  
249 problems into a series of intermediate steps.<sup>25</sup> This can be done in a zero-shot manner (zero-  
250 shot-CoT), with large language models shown to be decent zero-shot reasoners by adding a  
251 simple prompt, ‘Let’s think step by step’ to facilitate step-by-step reasoning before answering  
252 each question.<sup>14</sup> Alternatively, few-shot chain-of-thought prompting can be used, with  
253 additional examples of prompt and answer pairs either manually (manual CoT) or  
254 computationally (e.g auto-CoT) provided and concatenated with the prompt of interest.<sup>25,26</sup>  
255 Current understanding of the impact of zero-shot-CoT, manual CoT, and auto-CoT prompt  
256 engineering techniques applied to clinical text is limited. In this work, we sought to focus on  
257 zero-shot-CoT and investigate the effect of adding ‘Let’s think step by step’ to the prompt on  
258 model performance.

259

260 Our *initial prompt* (Prompt A) simply asked GPT-3.5-turbo to return whether the patient  
261 should be e.g. admitted to hospital, without any additional explanation. We additionally  
262 attempted to engineer prompts to a) reduce the high false positive rate of GPT-3.5-turbo

263 recommendations (Prompt B) and b) examine whether zero-shot chain-of-thought prompting  
264 could improve GPT-3.5-turbo performance (Prompts C and D). Attempting to reduce the high  
265 GPT-3.5-turbo false positive rate, Prompt B was constructed by adding an additional sentence  
266 to Prompt A: ‘Only suggest *\*clinical recommendation\** if absolutely required’. This  
267 modification was kept for Prompts C and D, which were constructed to examine chain-of-  
268 thought prompting. Because chain-of-thought prompting is most effective when the LLM  
269 provides reasoning in its output, we removed the instruction ‘Please do not return any  
270 additional explanation’ from Prompts C and D, and added the chain-of-thought prompt ‘Let’s  
271 think step by step’ to Prompt D, increasing GPT-3.5-turbo response verbosity (Table S2,  
272 Supplementary File 1). Prompt C therefore served as a baseline for comparison of GPT-3.5-  
273 turbo performance when it is permitted to return additional explanation (in addition to its  
274 outcome recommendation), allowing comparisons with both Prompt A (where no additional  
275 explanations were allowed in the prompt) and Prompt D (where the effect of chain-of-thought  
276 prompting was examined).

277

278 To evaluate the performance of GPT-3.5-turbo in a real-world setting, we constructed a  
279 random, unbalanced sample of 1000 ED visits where the distribution of patient outcomes (i.e.  
280 admission status, radiological investigation(s) request status and antibiotic prescription status)  
281 mirrored the distributions of patients presenting to ED from our main cohort. The *Presenting*  
282 *History* and *Physical Examination* sections of the ED Physician’s note for each ED visit were  
283 again passed to the GPT-3.5-turbo API in an identical manner to the balanced datasets, while  
284 a resident physician manually labelled the entire sample to allow human vs machine  
285 comparison. Classification accuracy was calculated in addition to the aforementioned  
286 evaluation metrics utilised for the balanced datasets to provide a summative evaluation metric  
287 for this real-world simulated task.

288

289 *Sensitivity analysis*

290 Due to the stochastic nature of large language models, it is possible that the order of labels  
291 reported in the original prompt may affect the subsequent labels returned. To test this, we  
292 conducted a sensitivity analysis on a balanced  $n = 200$  subsample for each outcome where the  
293 positive outcome was referenced before the negative outcome in the initial prompt (e.g. ‘1:  
294 Patient should be admitted to hospital’ precedes ‘0: Patient should not be admitted to  
295 hospital’ in the GPT-3.5-turbo prompt).

296

297

298 **Figures**

299 **Figure 1.** Flowchart of included Emergency Department visits and construction of both  
300 balanced (n = 10,000 samples) and unbalanced (n = 1000 sample reflecting the real-world  
301 distribution of patients presenting to the Emergency Department) datasets for the following  
302 outcomes: 1) Admission status, 2) Radiological investigation(s) status, and 3) Antibiotic  
303 prescription status.

304 **Figure 2.** Evaluation of physician and GPT-3.5-turbo accuracy across four iterations of  
305 prompt engineering [Prompt A-D] evaluated on an unbalanced n = 1000 sample reflective of  
306 the real-world distribution of clinical recommendations among patients presenting to ED, for  
307 the following three clinical recommendation tasks: 1) Should the patient be admitted to  
308 hospital; 2) Does the patient require radiological investigation; and 3) Does the patient  
309 require antibiotics.

310

311

312 **Tables**

313

314 **Table 1.** GPT-3.5-turbo performance across four iterations of prompt engineering (Prompt A-  
315 D) evaluated on a balanced n = 10,000 sample for three clinical recommendation tasks: 1)  
316 Should the patient be admitted to hospital; 2) Does the patient require radiological  
317 investigation; and 3) Does the patient require antibiotics.

318 **Table 2.** Comparison of physician and GPT-3.5-turbo performance across four iterations of  
319 prompt engineering [Prompt A-D] evaluated on a balanced n = 200 subsample for three  
320 clinical recommendation tasks: 1) Should the patient be admitted to hospital; 2) Does the  
321 patient require radiological investigation; and 3) Does the patient require antibiotics.

322 \*Physicians were provided the same prompt text as in Prompt A.

323 **Table 3.** Comparison of physician and GPT-3.5-turbo performance across four iterations of  
324 prompt engineering [Prompt A-D] evaluated on an unbalanced n = 1000 sample reflective of  
325 the real-world distribution of clinical recommendations among patients presenting to ED, for  
326 the following three clinical recommendation tasks: 1) Should the patient be admitted to  
327 hospital; 2) Does the patient require radiological investigation; and 3) Does the patient  
328 require antibiotics. \*Physicians were provided the same prompt text as in Prompt A.

329

330

331 **Tables**

| <b>Task</b>                                     |          | <b>True positives, n (%)</b> | <b>False positives, n (%)</b> | <b>True negatives, n (%)</b> | <b>False Negatives, n (%)</b> | <b>Sensitivity</b> | <b>Specificity</b> |
|-------------------------------------------------|----------|------------------------------|-------------------------------|------------------------------|-------------------------------|--------------------|--------------------|
| 1) Admission status                             | Prompt A | 4994 (49.9)                  | 4639 (46.4)                   | 361 (3.6)                    | 6 (0.1)                       | <b>1.00</b>        | 0.07               |
|                                                 | Prompt B | 4904 (49)                    | 3527 (35.3)                   | 1473 (14.7)                  | 96 (1)                        | 0.98               | 0.29               |
|                                                 | Prompt C | 4683 (46.8)                  | 3255 (32.6)                   | 1745 (17.5)                  | 317 (3.2)                     | 0.94               | 0.35               |
|                                                 | Prompt D | 4617 (46.2)                  | 3165 (31.7)                   | 1835 (18.4)                  | 383 (3.8)                     | 0.92               | <b>0.37</b>        |
| 2) Radiological investigation(s) request status | Prompt A | 4922 (49.2)                  | 4361 (43.6)                   | 639 (6.4)                    | 78 (0.8)                      | <b>0.98</b>        | 0.13               |
|                                                 | Prompt B | 4805 (48.1)                  | 3906 (39.1)                   | 1094 (10.9)                  | 195 (2)                       | 0.96               | 0.22               |
|                                                 | Prompt C | 4792 (47.9)                  | 3855 (38.6)                   | 1145 (11.5)                  | 208 (2.1)                     | 0.96               | <b>0.23</b>        |
|                                                 | Prompt D | 4819 (48.2)                  | 3991 (39.9)                   | 1009 (10.1)                  | 181 (1.8)                     | 0.96               | 0.20               |
| 3) Antibiotic prescription status               | Prompt A | 4812 (48.1)                  | 3955 (39.6)                   | 1045 (10.5)                  | 188 (1.9)                     | <b>0.96</b>        | 0.21               |
|                                                 | Prompt B | 4690 (46.9)                  | 3687 (36.9)                   | 1313 (13.1)                  | 310 (3.1)                     | 0.94               | 0.26               |
|                                                 | Prompt C | 4658 (46.6)                  | 3639 (36.4)                   | 1361 (13.6)                  | 342 (3.4)                     | 0.93               | <b>0.27</b>        |
|                                                 | Prompt D | 4544 (45.4)                  | 3379 (33.8)                   | 1621 (16.2)                  | 456 (4.6)                     | 0.91               | 0.32               |

332 **Table 1.** GPT-3.5-turbo performance across four iterations of prompt engineering (Prompt A-  
 333 D) evaluated on a balanced n = 10,000 sample for three clinical recommendation tasks: 1)  
 334 Should the patient be admitted to hospital; 2) Does the patient require radiological  
 335 investigation; and 3) Does the patient require antibiotics.

336



| Task                                            |                  | True positives, n (%) | False positives, n (%) | True negatives, n (%) | False Negatives, n (%) | Sensitivity | Specificity |
|-------------------------------------------------|------------------|-----------------------|------------------------|-----------------------|------------------------|-------------|-------------|
| 1) Admission status                             | <i>Physician</i> | 73 (36.5)             | 26 (13)                | 74 (37)               | 27 (13.5)              | 0.73        | <b>0.74</b> |
|                                                 | Prompt A         | 100 (50)              | 93 (46.5)              | 7 (3.5)               | 0 (0)                  | <b>1.00</b> | 0.07        |
|                                                 | Prompt B         | 98 (49)               | 67 (33.5)              | 33 (16.5)             | 2 (1)                  | 0.98        | 0.33        |
|                                                 | Prompt C         | 95 (47.5)             | 61 (30.5)              | 39 (19.5)             | 5 (2.5)                | 0.95        | 0.39        |
|                                                 | Prompt D         | 93 (46.5)             | 60 (30)                | 40 (20)               | 7 (3.5)                | 0.93        | 0.40        |
| 2) Radiological investigation(s) request status | <i>Physician</i> | 76 (38)               | 21 (10.5)              | 79 (39.5)             | 24 (12)                | 0.76        | <b>0.79</b> |
|                                                 | Prompt A         | 96 (48)               | 91 (45.5)              | 9 (4.5)               | 4 (2)                  | <b>0.96</b> | 0.09        |
|                                                 | Prompt B         | 93 (46.5)             | 83 (41.5)              | 17 (8.5)              | 7 (3.5)                | 0.93        | 0.17        |
|                                                 | Prompt C         | 95 (47.5)             | 83 (41.5)              | 17 (8.5)              | 5 (2.5)                | 0.95        | 0.17        |
|                                                 | Prompt D         | 95 (47.5)             | 84 (42)                | 16 (8)                | 5 (2.5)                | 0.95        | 0.16        |
| 3) Antibiotic prescription status               | <i>Physician</i> | 64 (32)               | 22 (11)                | 78 (39)               | 36 (18)                | 0.64        | <b>0.78</b> |
|                                                 | Prompt A         | 93 (46.5)             | 74 (37)                | 26 (13)               | 7 (3.5)                | <b>0.93</b> | 0.26        |
|                                                 | Prompt B         | 91 (45.5)             | 71 (35.5)              | 29 (14.5)             | 9 (4.5)                | 0.91        | 0.29        |
|                                                 | Prompt C         | 92 (46)               | 68 (34)                | 32 (16)               | 8 (4)                  | 0.92        | 0.32        |
|                                                 | Prompt D         | 89 (44.5)             | 63 (31.5)              | 37 (18.5)             | 11 (5.5)               | 0.89        | 0.37        |

337 **Table 2.** Comparison of physician and GPT-3.5-turbo performance across four iterations of  
338 prompt engineering [Prompt A-D] evaluated on a balanced n = 200 subsample for three  
339 clinical recommendation tasks: 1) Should the patient be admitted to hospital; 2) Does the  
340 patient require radiological investigation; and 3) Does the patient require antibiotics.  
341 \*Physicians were provided the same prompt text as in Prompt A.

342

| Task                                            |                  | True positives, n (%) | False positives, n (%) | True negatives, n (%) | False Negatives, n (%) | Sensitivity | Specificity | Accuracy    |
|-------------------------------------------------|------------------|-----------------------|------------------------|-----------------------|------------------------|-------------|-------------|-------------|
| 1) Admission status                             | <i>Physician</i> | 151 (15.1)            | 79 (7.9)               | 683 (68.3)            | 87 (8.7)               | 0.63        | <b>0.90</b> | <b>0.83</b> |
|                                                 | Prompt A         | 237 (23.7)            | 714 (71.4)             | 48 (4.8)              | 1 (0.1)                | <b>1.00</b> | 0.06        | 0.29        |
|                                                 | Prompt B         | 234 (23.4)            | 514 (51.4)             | 248 (24.8)            | 4 (0.4)                | 0.98        | 0.33        | 0.48        |
|                                                 | Prompt C         | 232 (23.2)            | 475 (47.5)             | 287 (28.7)            | 6 (0.6)                | 0.97        | 0.38        | 0.52        |
|                                                 | Prompt D         | 226 (22.6)            | 463 (46.3)             | 299 (29.9)            | 12 (1.2)               | 0.95        | 0.39        | 0.53        |
| 2) Radiological investigation(s) request status | <i>Physician</i> | 527 (52.7)            | 109 (10.9)             | 261 (26.1)            | 103 (10.3)             | 0.84        | <b>0.71</b> | <b>0.79</b> |
|                                                 | Prompt A         | 619 (61.9)            | 314 (31.4)             | 56 (5.6)              | 11 (1.1)               | <b>0.98</b> | 0.15        | 0.68        |
|                                                 | Prompt B         | 604 (60.4)            | 274 (27.4)             | 96 (9.6)              | 26 (2.6)               | 0.96        | 0.26        | 0.70        |
|                                                 | Prompt C         | 604 (60.4)            | 268 (26.8)             | 102 (10.2)            | 26 (2.6)               | 0.96        | 0.28        | 0.71        |
|                                                 | Prompt D         | 608 (60.8)            | 276 (27.6)             | 94 (9.4)              | 22 (2.2)               | 0.97        | 0.25        | 0.70        |
| 3) Antibiotic prescription status               | <i>Physician</i> | 96 (9.6)              | 142 (14.2)             | 686 (68.6)            | 76 (7.6)               | 0.56        | <b>0.83</b> | <b>0.78</b> |
|                                                 | Prompt A         | 162 (16.2)            | 642 (64.2)             | 186 (18.6)            | 10 (1)                 | <b>0.94</b> | 0.22        | 0.35        |
|                                                 | Prompt B         | 159 (15.9)            | 594 (59.4)             | 234 (23.4)            | 13 (1.3)               | 0.92        | 0.28        | 0.39        |
|                                                 | Prompt C         | 158 (15.8)            | 596 (59.6)             | 232 (23.2)            | 14 (1.4)               | 0.92        | 0.28        | 0.39        |
|                                                 | Prompt D         | 155 (15.5)            | 552 (55.2)             | 276 (27.6)            | 17 (1.7)               | 0.90        | 0.33        | 0.43        |

343 **Table 3.** Comparison of physician and GPT-3.5-turbo performance across four iterations of  
344 prompt engineering [Prompt A-D] evaluated on an unbalanced n = 1000 sample reflective of  
345 the real-world distribution of clinical recommendations among patients presenting to ED, for  
346 the following three clinical recommendation tasks: 1) Should the patient be admitted to  
347 hospital; 2) Does the patient require radiological investigation; and 3) Does the patient  
348 require antibiotics.

349

350

351

352

## 353 **References**

354

- 355 1. Hu K, Hu K. ChatGPT sets record for fastest-growing user base - analyst note. *Reuters*.  
356 [https://www.reuters.com/technology/chatgpt-sets-record-fastest-growing-user-base-](https://www.reuters.com/technology/chatgpt-sets-record-fastest-growing-user-base-analyst-note-2023-02-01/)  
357 [analyst-note-2023-02-01/](https://www.reuters.com/technology/chatgpt-sets-record-fastest-growing-user-base-analyst-note-2023-02-01/). Published February 2, 2023. Accessed August 7, 2023.
- 358 2. GPT-4. Accessed August 7, 2023. <https://openai.com/gpt-4>
- 359 3. OpenAI. GPT-4 Technical Report. Published online March 27, 2023.  
360 doi:10.48550/arXiv.2303.08774
- 361 4. Sarraju A, Bruemmer D, Van Iterson E, Cho L, Rodriguez F, Laffin L. Appropriateness  
362 of Cardiovascular Disease Prevention Recommendations Obtained From a Popular  
363 Online Chat-Based Artificial Intelligence Model. *JAMA*. 2023;329(10):842-844.  
364 doi:10.1001/jama.2023.1044
- 365 5. Ayers JW, Poliak A, Dredze M, et al. Comparing Physician and Artificial Intelligence  
366 Chatbot Responses to Patient Questions Posted to a Public Social Media Forum. *JAMA*  
367 *Intern Med*. 2023;183(6):589-596. doi:10.1001/jamainternmed.2023.1838
- 368 6. Kung TH, Cheatham M, Medenilla A, et al. Performance of ChatGPT on USMLE:  
369 Potential for AI-assisted medical education using large language models. *PLOS Digit*  
370 *Health*. 2023;2(2):e0000198. doi:10.1371/journal.pdig.0000198
- 371 7. Kanjee Z, Crowe B, Rodman A. Accuracy of a Generative Artificial Intelligence Model  
372 in a Complex Diagnostic Challenge. *JAMA*. 2023;330(1):78-80.  
373 doi:10.1001/jama.2023.8288
- 374 8. Singhal K, Tu T, Gottweis J, et al. Towards Expert-Level Medical Question Answering  
375 with Large Language Models. Published online May 16, 2023.  
376 doi:10.48550/arXiv.2305.09617
- 377 9. Nori H, King N, McKinney SM, Carignan D, Horvitz E. Capabilities of GPT-4 on  
378 Medical Challenge Problems. Published online April 12, 2023.  
379 doi:10.48550/arXiv.2303.13375
- 380 10. Kanter GP, Packel EA. Health Care Privacy Risks of AI Chatbots. *JAMA*.  
381 2023;330(4):311-312. doi:10.1001/jama.2023.9618
- 382 11. Lee P, Bubeck S, Petro J. Benefits, Limits, and Risks of GPT-4 as an AI Chatbot for  
383 Medicine. *N Engl J Med*. 2023;388(13):1233-1239. doi:10.1056/NEJMs2214184
- 384 12. Williams CYK, Zack T, Miao BY, Sushil M, Wang M, Butte AJ. Assessing clinical  
385 acuity in the Emergency Department using the GPT-3.5 Artificial Intelligence Model.  
386 Published online August 13, 2023:2023.08.09.23293795.  
387 doi:10.1101/2023.08.09.23293795
- 388 13. Liu P, Yuan W, Fu J, Jiang Z, Hayashi H, Neubig G. Pre-train, Prompt, and Predict: A  
389 Systematic Survey of Prompting Methods in Natural Language Processing. *ACM Comput*  
390 *Surv*. 2023;55(9):195:1-195:35. doi:10.1145/3560815

- 391 14. Kojima T, Gu SS, Reid M, Matsuo Y, Iwasawa Y. Large Language Models are Zero-Shot  
392 Reasoners. Published online January 29, 2023. doi:10.48550/arXiv.2205.11916
- 393 15. Barasa EW, Molyneux S, English M, Cleary S. Setting healthcare priorities in hospitals: a  
394 review of empirical studies. *Health Policy Plan.* 2015;30(3):386-396.  
395 doi:10.1093/heapol/czu010
- 396 16. Latifi N, Redberg RF, Grady D. The Next Frontier of Less Is More—From Description to  
397 Implementation. *JAMA Intern Med.* 2022;182(2):103-105.  
398 doi:10.1001/jamainternmed.2021.6908
- 399 17. Wong A, Otles E, Donnelly JP, et al. External Validation of a Widely Implemented  
400 Proprietary Sepsis Prediction Model in Hospitalized Patients. *JAMA Intern Med.*  
401 2021;181(8):1065-1070. doi:10.1001/jamainternmed.2021.2626
- 402 18. Habib AR, Lin AL, Grant RW. The Epic Sepsis Model Falls Short—The Importance of  
403 External Validation. *JAMA Intern Med.* 2021;181(8):1040-1041.  
404 doi:10.1001/jamainternmed.2021.3333
- 405 19. Sushil M, Kennedy VE, Miao BY, Mandair D, Zack T, Butte AJ. Extracting detailed  
406 oncologic history and treatment plan from medical oncology notes with large language  
407 models. Published online August 7, 2023. doi:10.48550/arXiv.2308.03853
- 408 20. Lyu Q, Tan J, Zapadka ME, et al. Translating Radiology Reports into Plain Language  
409 using ChatGPT and GPT-4 with Prompt Learning: Promising Results, Limitations, and  
410 Potential. Published online March 28, 2023. doi:10.48550/arXiv.2303.09038
- 411 21. Chen S, Li Y, Lu S, et al. Evaluation of ChatGPT Family of Models for Biomedical  
412 Reasoning and Classification. Published online April 5, 2023.  
413 doi:10.48550/arXiv.2304.02496
- 414 22. Zhang J, Sun K, Jagadeesh A, et al. The Potential and Pitfalls of using a Large Language  
415 Model such as ChatGPT or GPT-4 as a Clinical Assistant. Published online July 16,  
416 2023. doi:10.48550/arXiv.2307.08152
- 417 23. Wang Z, Li R, Dong B, et al. Can LLMs like GPT-4 outperform traditional AI tools in  
418 dementia diagnosis? Maybe, but not today. Published online June 2, 2023.  
419 doi:10.48550/arXiv.2306.01499
- 420 24. Dash D, Thapa R, Banda JM, et al. Evaluation of GPT-3.5 and GPT-4 for supporting  
421 real-world information needs in healthcare delivery. Published online April 30, 2023.  
422 doi:10.48550/arXiv.2304.13714
- 423 25. Wei J, Wang X, Schuurmans D, et al. Chain-of-Thought Prompting Elicits Reasoning in  
424 Large Language Models. arXiv.org. Published January 28, 2022. Accessed August 7,  
425 2023. <https://arxiv.org/abs/2201.11903v6>
- 426 26. Zhang Z, Zhang A, Li M, Smola A. Automatic Chain of Thought Prompting in Large  
427 Language Models. Published online October 7, 2022. doi:10.48550/arXiv.2210.03493
- 428 27. Brown TB, Mann B, Ryder N, et al. Language Models are Few-Shot Learners. Published  
429 online July 22, 2020. doi:10.48550/arXiv.2005.14165

- 430 28. Alsentzer E, Murphy JR, Boag W, et al. Publicly Available Clinical BERT Embeddings.  
431 arXiv.org. Published April 6, 2019. Accessed May 13, 2023.  
432 <https://arxiv.org/abs/1904.03323v3>
- 433 29. Radhakrishnan L, Schenk G, Muenzen K, et al. A certified de-identification system for all  
434 clinical text documents for information extraction at scale. *JAMIA Open*.  
435 2023;6(3):ooad045. doi:10.1093/jamiaopen/ooad045
- 436  
437

## 438 **Acknowledgements**

439 The authors acknowledge the use of the UCSF Information Commons computational research  
440 platform, developed and supported by UCSF Bakar Computational Health Sciences Institute.  
441 The authors also thank the UCSF AI Tiger Team, Academic Research Services, Research  
442 Information Technology, and the Chancellor’s Task Force for Generative AI for their  
443 software development, analytical and technical support related to the use of Versa API  
444 gateway (the UCSF secure implementation of large language models and generative AI via  
445 API gateway), Versa chat (the chat user interface), and related data asset and services.

446

## 447 **Data availability**

448 The code accompanying this manuscript is available at <https://github.com/cykwilliams/GPT-3.5-Clinical-Recommendations-in-Emergency-Department/>.

450

## 451 **Conflicts of Interest**

452 CYKW has no conflicts of interest to disclose. BYM is a paid consultant for SandboxAQ.  
453 AJB is a co-founder and consultant to Personalis and NuMedii; consultant to Mango Tree  
454 Corporation, and in the recent past, Samsung, 10x Genomics, Helix, Pathway Genomics, and  
455 Verinata (Illumina); has served on paid advisory panels or boards for Geisinger Health,  
456 Regenstrief Institute, Gerson Lehman Group, AlphaSights, Covance, Novartis, Genentech,  
457 and Merck, and Roche; is a shareholder in Personalis and NuMedii; is a minor shareholder in  
458 Apple, Meta (Facebook), Alphabet (Google), Microsoft, Amazon, Snap, 10x Genomics,  
459 Illumina, Regeneron, Sanofi, Pfizer, Royalty Pharma, Moderna, Sutro, Doximity, BioNtech,  
460 Invitae, Pacific Biosciences, Editas Medicine, Nuna Health, Assay Depot, and Vet24seven,  
461 and several other non-health related companies and mutual funds; and has received honoraria  
462 and travel reimbursement for invited talks from Johnson and Johnson, Roche, Genentech,  
463 Pfizer, Merck, Lilly, Takeda, Varian, Mars, Siemens, Optum, Abbott, Celgene, AstraZeneca,  
464 AbbVie, Westat, and many academic institutions, medical or disease specific foundations and  
465 associations, and health systems. AJB receives royalty payments through Stanford  
466 University, for several patents and other disclosures licensed to NuMedii and Personalis.  
467 AJB’s research has been funded by NIH, Peraton (as the prime on an NIH contract),  
468 Genentech, Johnson and Johnson, FDA, Robert Wood Johnson Foundation, Leon Lowenstein  
469 Foundation, Intervalien Foundation, Priscilla Chan and Mark Zuckerberg, the Barbara and  
470 Gerson Bakar Foundation, and in the recent past, the March of Dimes, Juvenile Diabetes  
471 Research Foundation, California Governor’s Office of Planning and Research, California  
472 Institute for Regenerative Medicine, L’Oreal, and Progenity. None of these entities had any  
473 bearing on the design of this study or the writing of the manuscript.

474

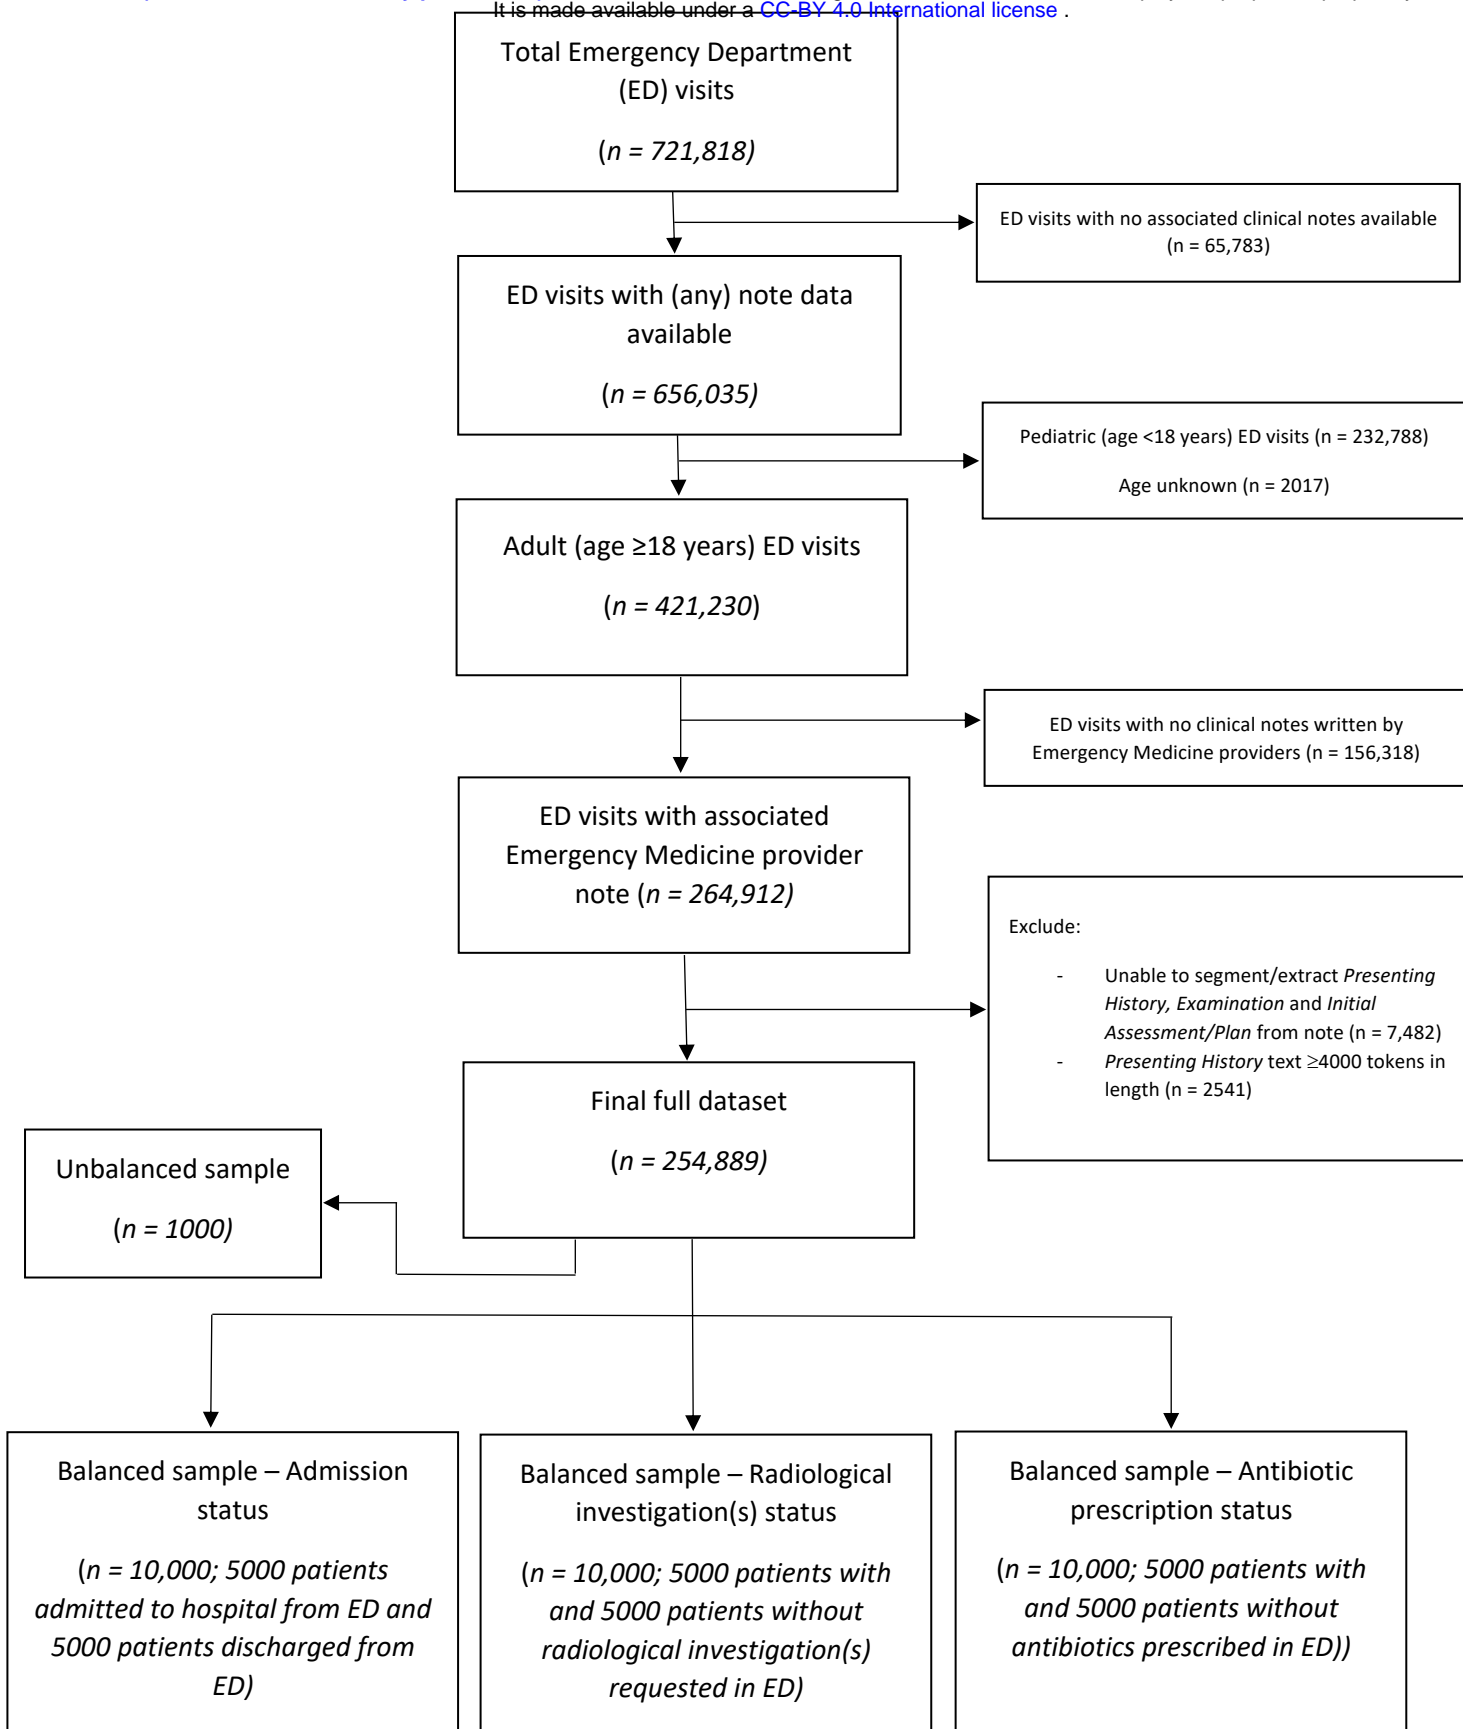

**Figure 1.** Flowchart of included Emergency Department visits and construction of both balanced (n = 10,000 samples) and unbalanced (n = 1000 sample reflecting the real-world distribution of patients presenting to the Emergency Department) datasets for the following outcomes: 1) Admission status, 2) Radiological investigation(s) status, and 3) Antibiotic prescription status



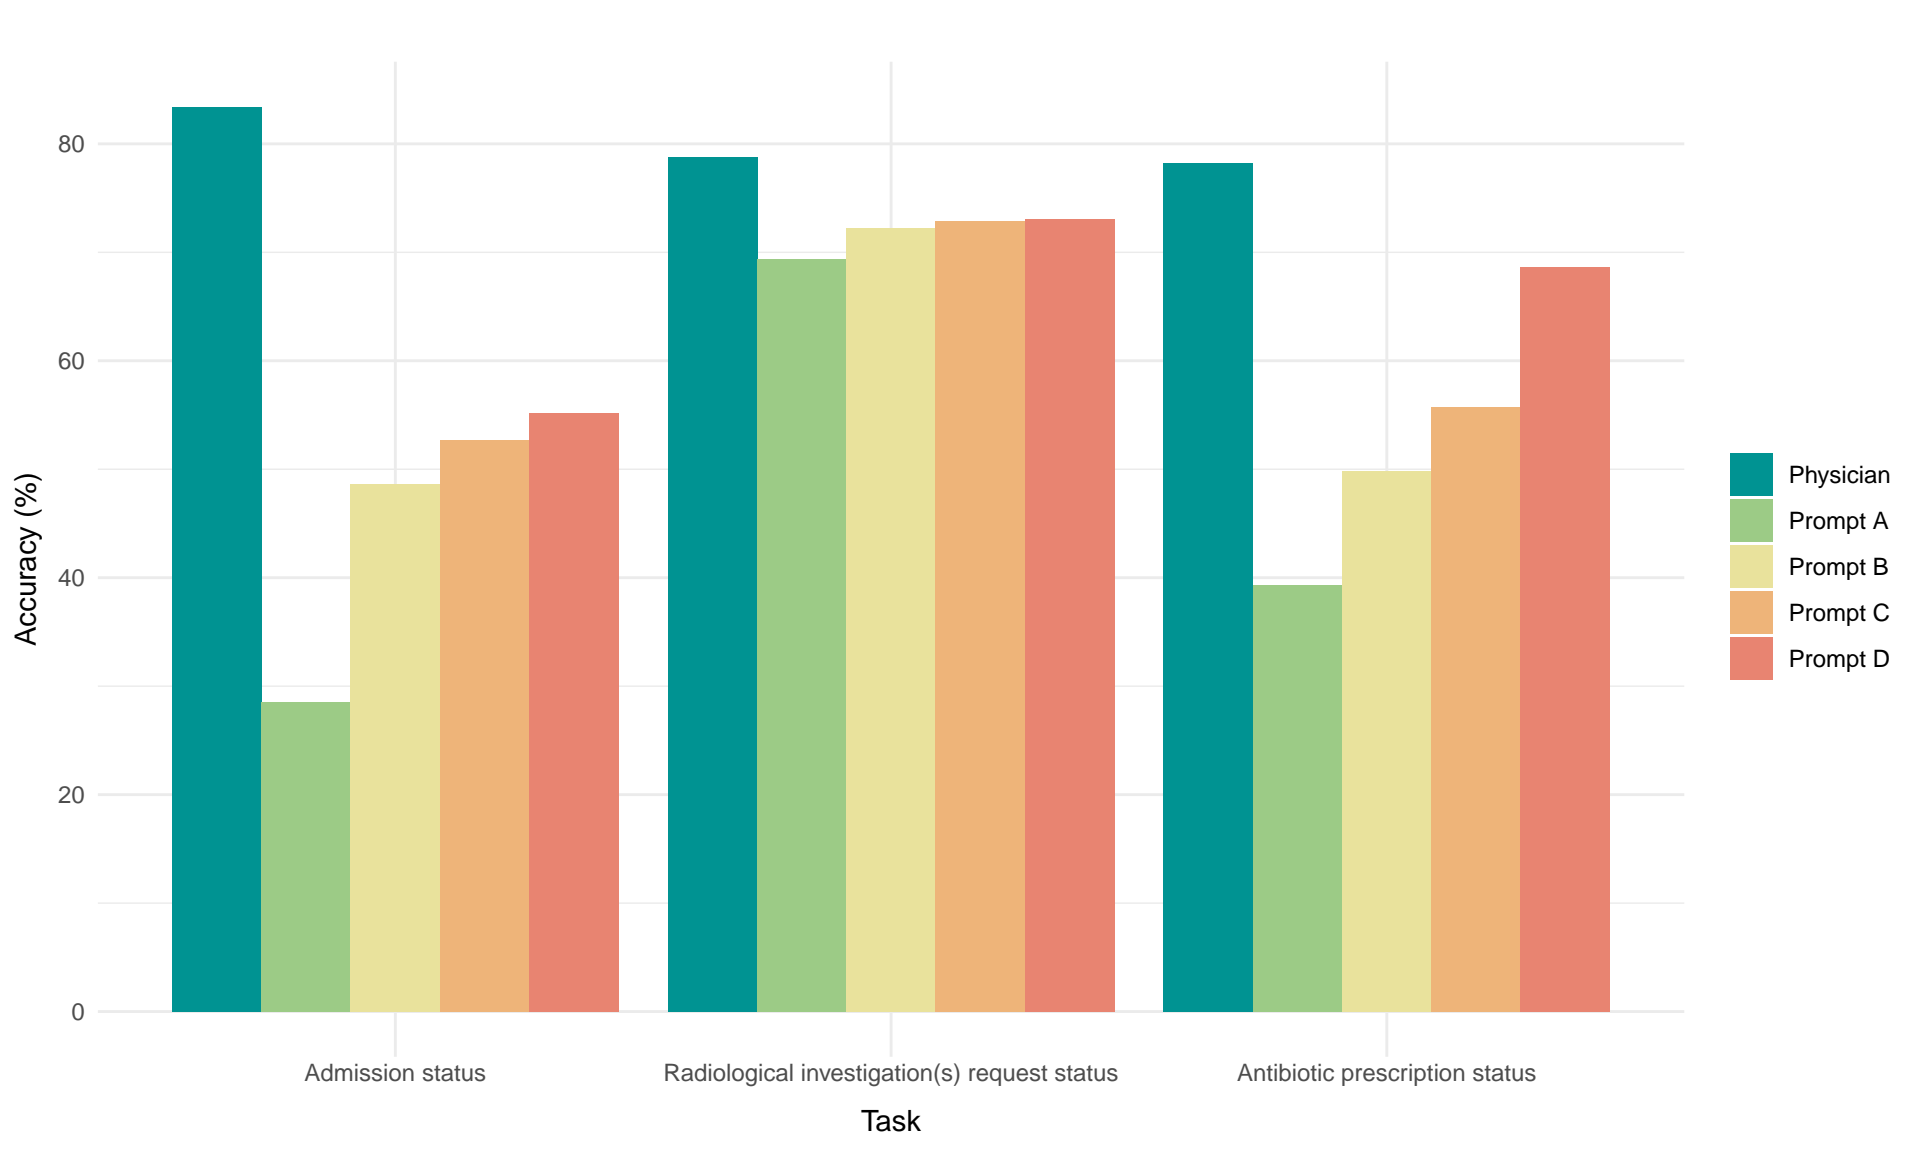

Source: https://medrxiv.org/content/10.1101/2023.10.19.23297276v1.full.pdf
